# Supplementary material
Source: publisher figshare collection journal article supplement (https://future-science-group.figshare.com/articles/dataset/_/21590622)
Supplement: Supplementary file 1 [file 1]

Supplementary Table 1. Combining Ratio of Ingredients for Niosomal Formulations of Azithromycin

| Formulation  No. | Molar Ratio | | | |
| --- | --- | --- | --- | --- |
| Span 60 | Cholesterol | Dicetylphosphate | Azithromycin |
| 1 | 1 | 5 | 1 | 1 |
| 2 | 2 | 4 | 1 | 1 |
| 3 | 3 | 3 | 1 | 1 |
| 4 | 4 | 2 | 1 | 1 |
| 5 | 5 | 1 | 1 | 1 |
